# Supplementary material for: Aqueous-phase fates of α-alkoxyalkyl-hydroperoxides derived from the reactions of Criegee intermediates with alcohols
Source: Royal Society of Chemistry journal article supplement (doi:10.1039/d0cp06308h), 2021-01-01
Supplement: d0cp06308h1.pdf [file d0cp06308h1.pdf]

Supplementary Information for  
**Aqueous-phase fates of  $\alpha$ -alkoxyalkyl-hydroperoxides derived  
from the reactions of Criegee intermediates with alcohols**

Mingxi Hu<sup>a</sup>, Junting Qiu<sup>a</sup>, Kenichi Tonokura<sup>a</sup>, Shinichi Enami\*<sup>c</sup>

<sup>a</sup>Graduate School of Frontier Sciences, The University of Tokyo, 5-1-5 Kashiwanoha,  
Kashiwa 277-8563, Japan

<sup>b</sup>National Institute for Environmental Studies, 16-2 Onogawa, Tsukuba 305-8506, Japan

**No. of Supporting Pages: 10**

**No. of Supporting Tables: 1**

**No. of Supporting Figures: 9**

**Table S1. Rate Coefficients and Lifetimes for Decay of the  $\alpha$ -HHs derived from  $\alpha$ -Terpineol Ozonolysis in 1-propanol:Water Solutions at Different pH.  $\tau_{1/e} = 1/k_{fast}$ .**

| [HCl] (mM) | pH  | $k_{fast}$ ( $10^{-3} s^{-1}$ ) | $k_{slow}$ ( $10^{-3} s^{-1}$ ) | $\tau_{1/e, decay}$ (min) |
|------------|-----|---------------------------------|---------------------------------|---------------------------|
| 0.01       | 5.3 | 1.0 $\pm$ 0.1                   | 0.14 $\pm$ 0.03                 | 17                        |
| 0.02       | 4.9 | 1.4 $\pm$ 0.1                   | 0.28 $\pm$ 0.02                 | 12                        |
| 0.05       | 4.5 | 2.0 $\pm$ 0.3                   | 0.19 $\pm$ 0.01                 | 8                         |
| 0.1        | 4.0 | 3.1 $\pm$ 0.6                   | 0.10 $\pm$ 0.04                 | 5                         |
| 0.2        | 3.8 | 5.6 $\pm$ 0.5                   | 0.10 $\pm$ 0.03                 | 3                         |

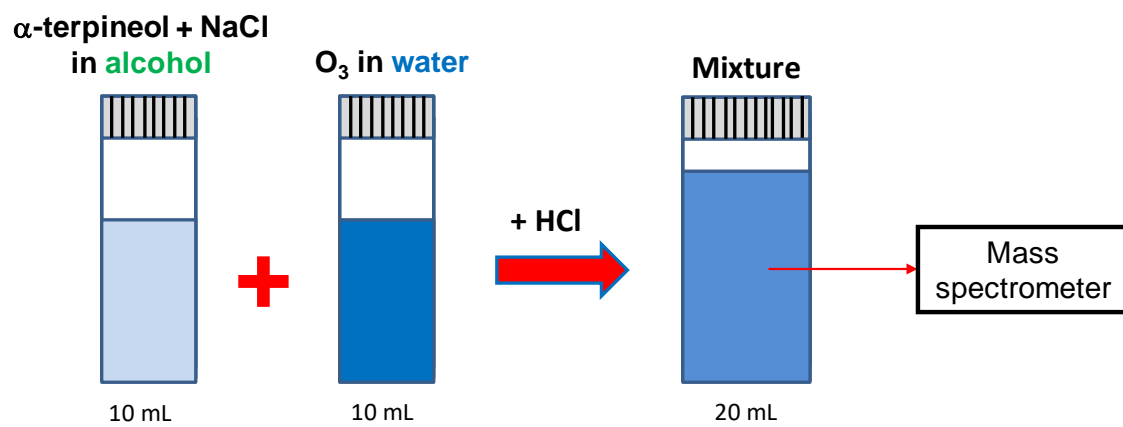

**Figure S1** – Schematic setup of present experiment.

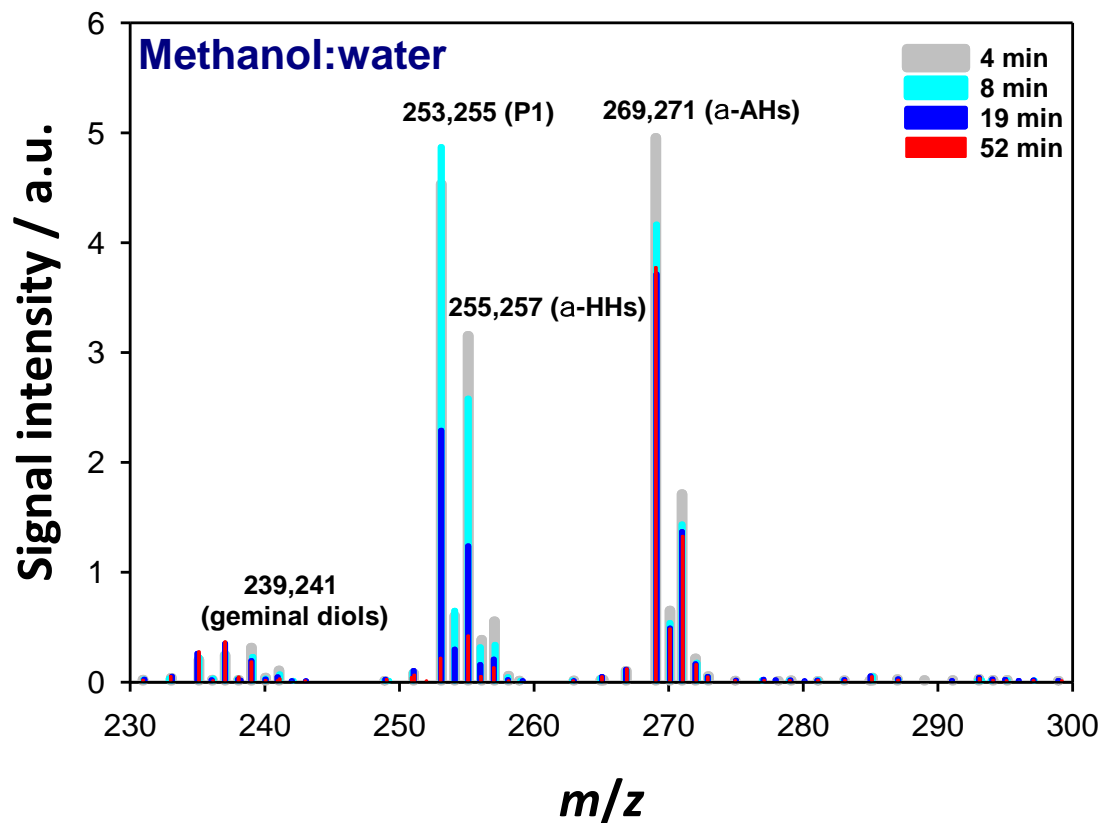

**Fig. S2.** Negative-ion mass spectra of mixtures obtained by ozonolysis ( $[O_3]_0 = 0.06 \pm 0.01$  mM) of aqueous solutions of  $\alpha$ -terpineol (1 mM), NaCl (0.2 mM) in methanol:H<sub>2</sub>O (1:1 = vol:vol) solution at T = 298 K. 0.05 mM HCl was added to the solution.

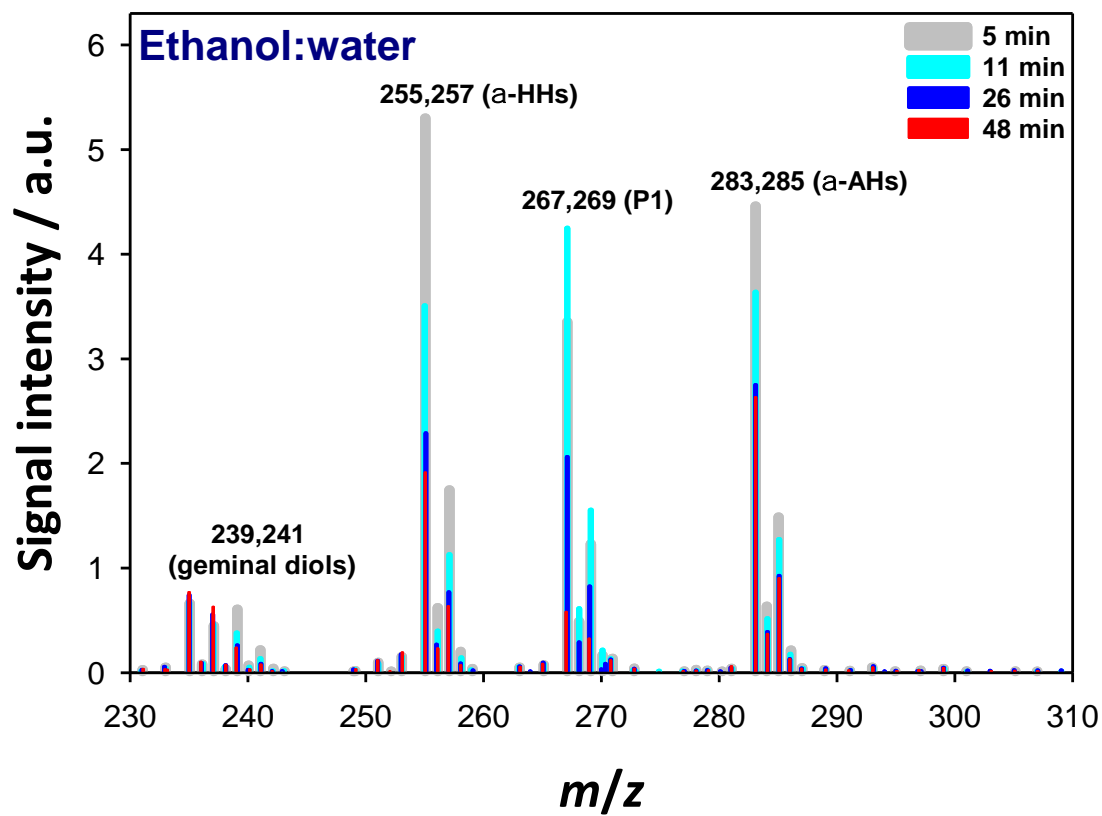

**Fig. S3.** Negative-ion mass spectra of mixtures obtained by ozonolysis ( $[O_3]_0 = 0.06 \pm 0.01$  mM) of aqueous solutions of  $\alpha$ -terpineol (1 mM), NaCl (0.2 mM) in ethanol:H<sub>2</sub>O (1:1 = vol:vol) solution at T = 298 K. 0.05 mM HCl was added to the solution.

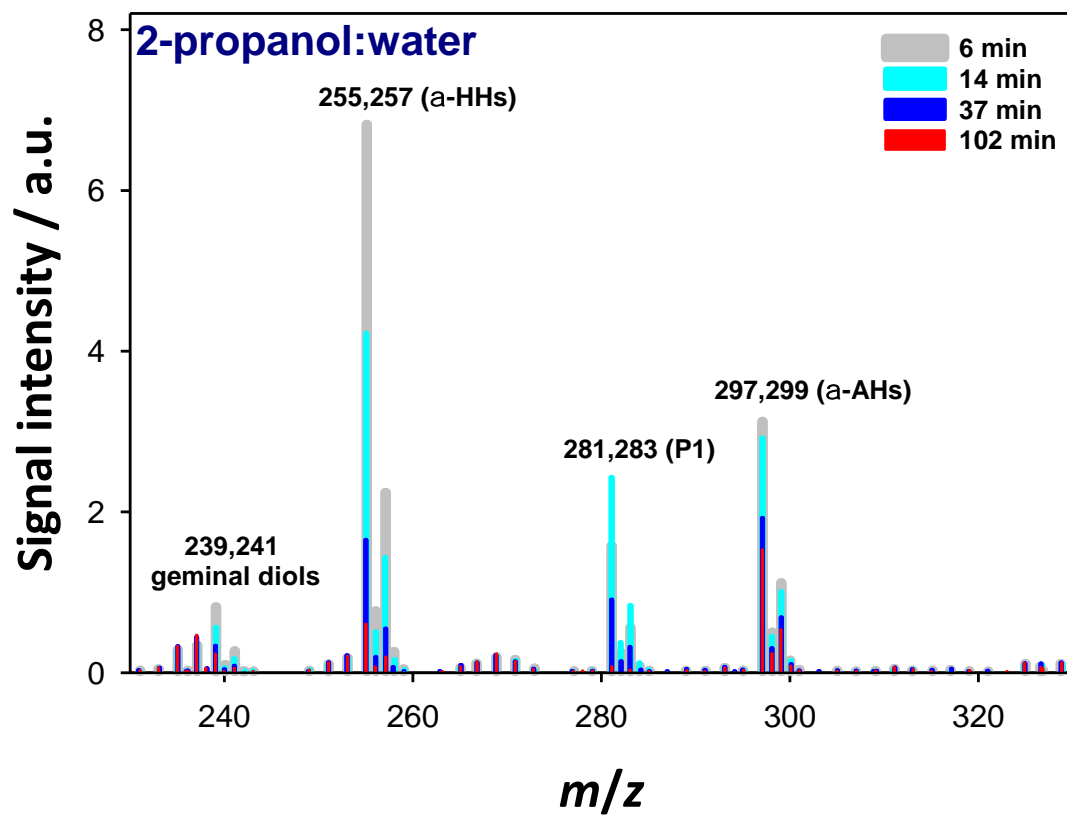

---

**Fig. S4.** Negative-ion mass spectra of mixtures obtained by ozonolysis ( $[O_3]_0 = 0.06 \pm 0.01$  mM) of aqueous solutions of  $\alpha$ -terpineol (1 mM), NaCl (0.2 mM) in 2-propanol:H<sub>2</sub>O (1:1 = vol:vol) solution at T = 298 K. 0.05 mM HCl was added to the solution.

---

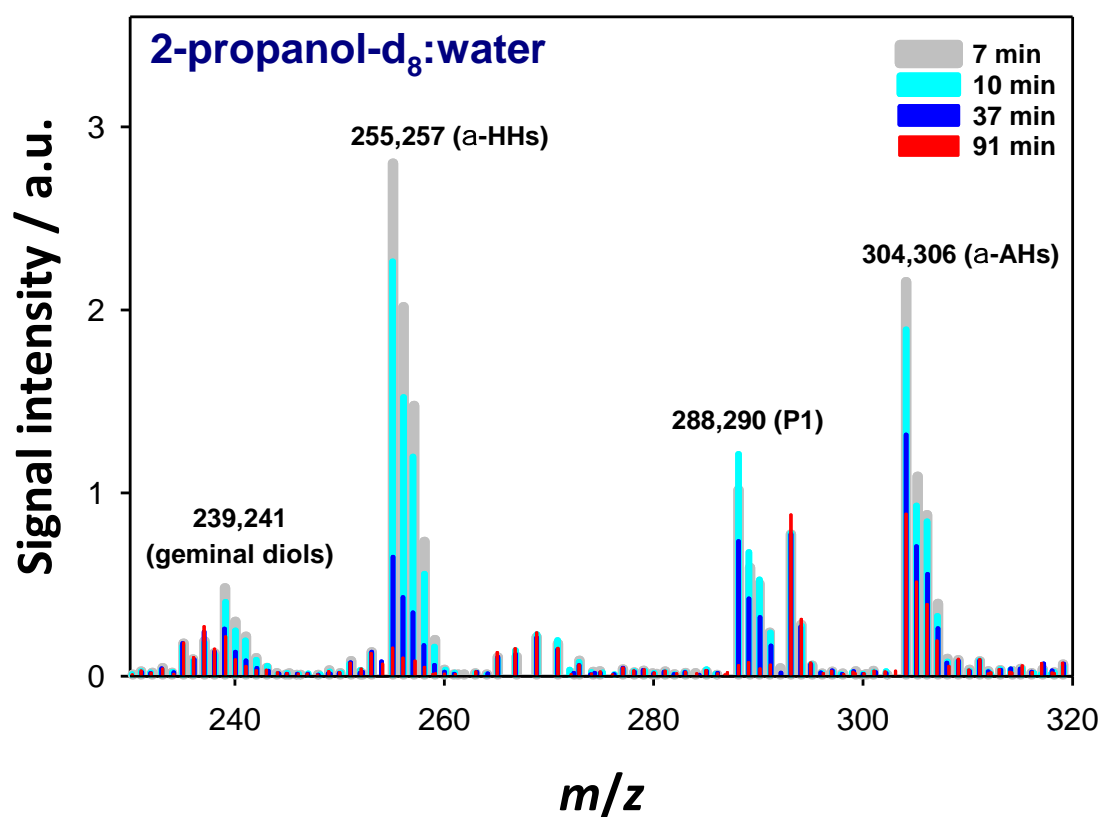

**Fig. S5.** Negative-ion mass spectra of mixtures obtained by ozonolysis ( $[O_3]_0 = 0.06 \pm 0.01$  mM) of aqueous solutions of  $\alpha$ -terpineol (1 mM), NaCl (0.2 mM) in 2-propanol-d<sub>8</sub>:H<sub>2</sub>O (1:1 = vol:vol) solution at T = 298 K. 0.05 mM HCl was added to the solution. Note that the  $\alpha$ -AH signals appearing at  $m/z = 154$  ( $\alpha$ -terpineol) + 48 ( $O_3$ ) + 68 (2-propanol-d<sub>8</sub>) + 35/37 ( $Cl^-$ ) = 305/307 was shifted to  $-1$  Da due the exchange of hydroperoxide -OO-D by -OO-H from H<sub>2</sub>O.

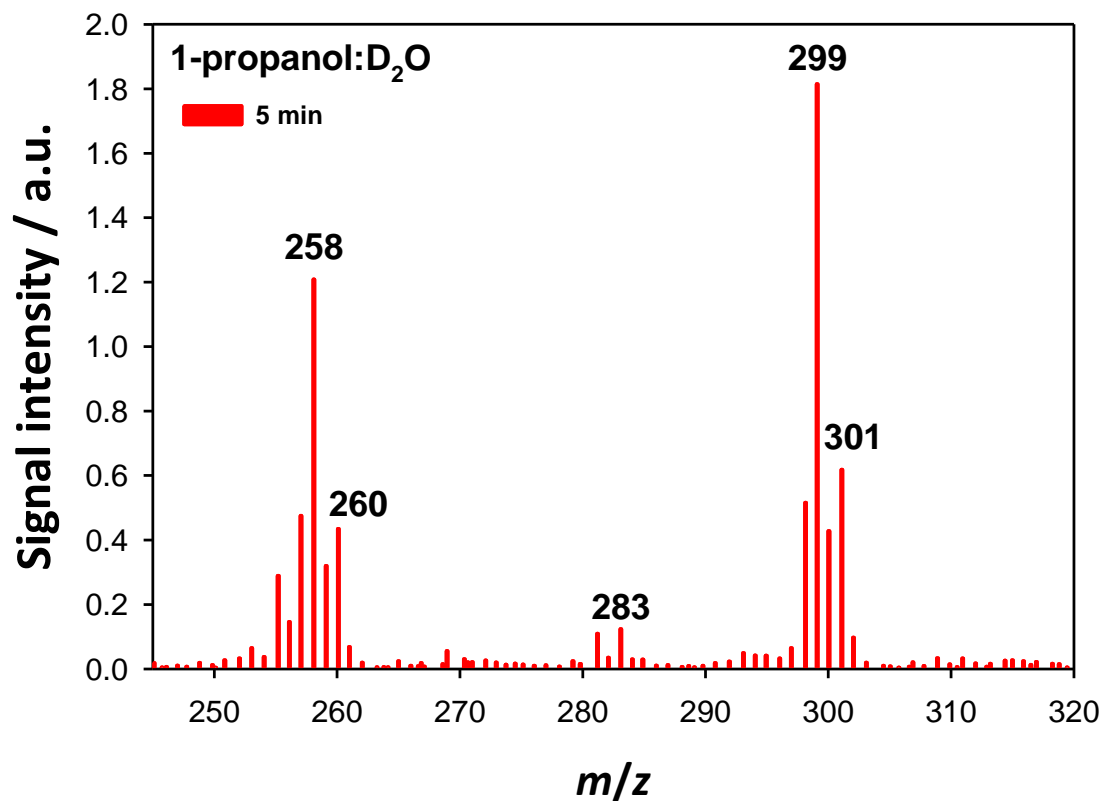

**Fig. S6.** Negative-ion mass spectra of mixtures obtained by ozonolysis ( $[O_3]_0 = 0.06 \pm 0.01$  mM) of aqueous solutions of  $\alpha$ -terpineol (1 mM), NaCl (0.2 mM) in 1-propanol:D<sub>2</sub>O (1:1 = vol:vol) solution at T = 298 K. 0.05 mM HCl was added to the solution.

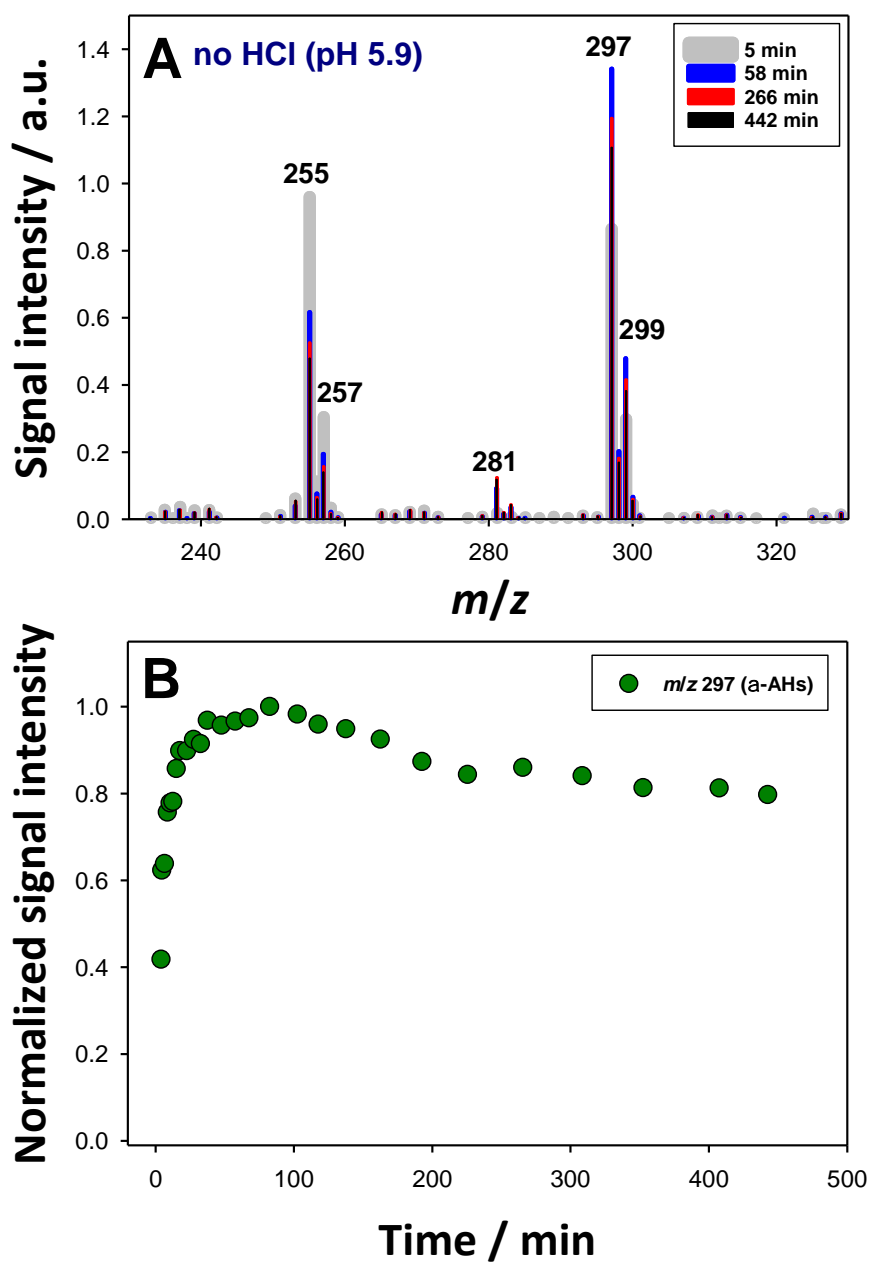


---

**Fig. S7.** A) Negative-ion mass spectra of mixtures obtained by ozonolysis ( $[O_3]_0 = 0.06 \pm 0.01$  mM) of aqueous solutions of  $\alpha$ -terpineol (1 mM), NaCl (0.2 mM) in 1-propanol:H<sub>2</sub>O (1:1 = vol:vol) solution in the absence of HCl at pH 5.9 and at T = 298 K. B) Normalized signal intensity at  $m/z$  297 as a function of time.

---



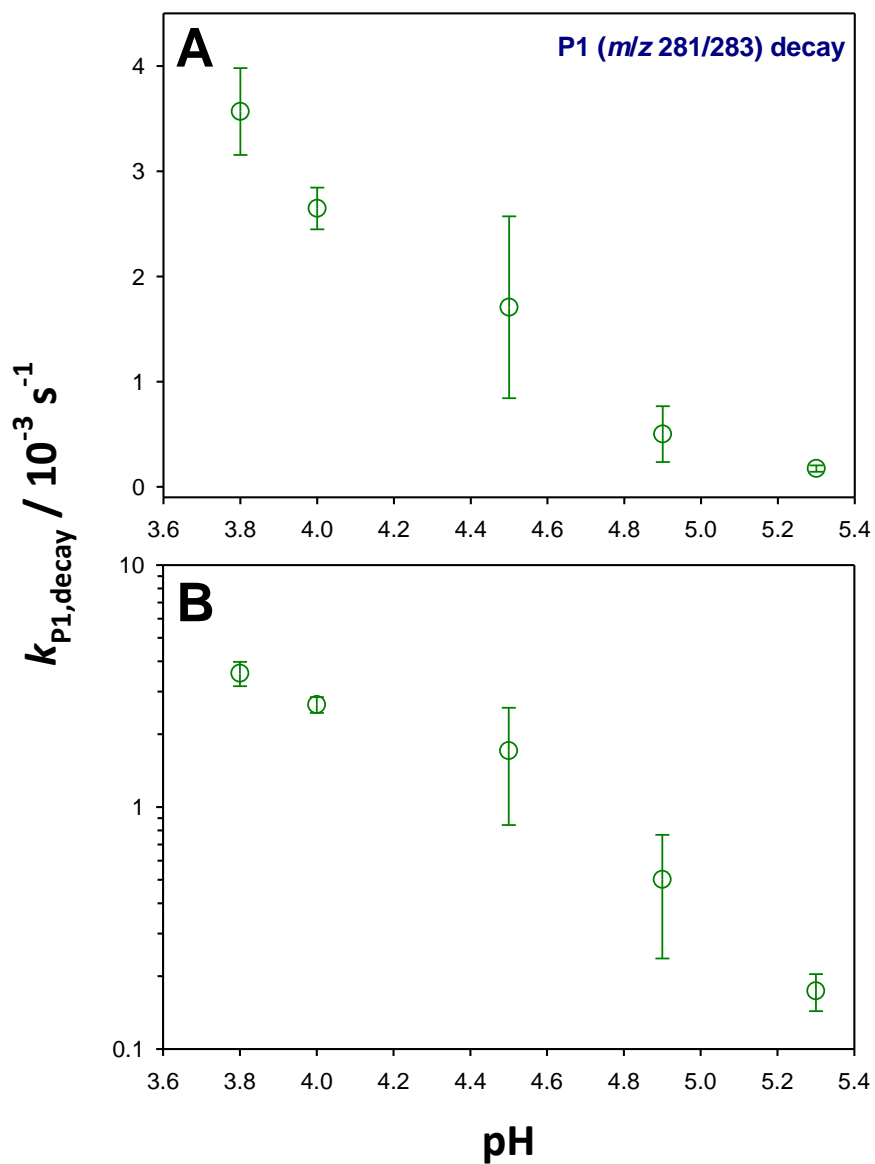

**Fig. S8.** A) The rate coefficients  $k$  for the decay of the *m/z* 281/283 signals obtained by ozonolysis of  $\alpha$ -terpineol (1 mM  $\alpha$ -terpineol, 0.2 mM NaCl) at  $[\text{O}_3]_0 = 0.06 \pm 0.01$  mM in 1-propanol:water (1:1 = vol:vol) solution as a function of pH at  $T = 298$  K. B) The semi-log plot.

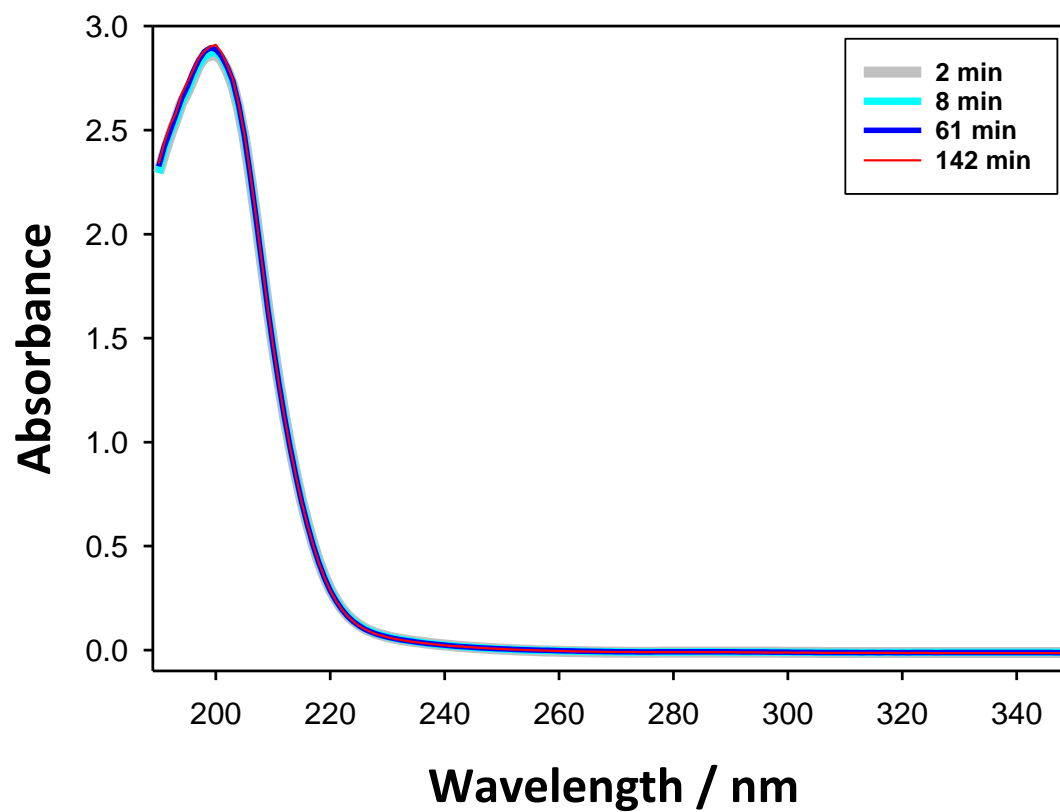

---

**Fig. S9.** UV-vis spectra obtained from 1 mM  $\alpha$ -terpineol + 0.2 mM NaCl + 0.06 mM  $O_3$  in 1-propanol:water (1:1) solution at pH 4.5 (by adding 0.05 mM HCl) after ozonolysis as a function of reaction time.

---
